# Supplementary material for: Synthesis and fast transfer of monolayer MoS2 on reusable fused silica
Source: Royal Society of Chemistry journal article supplement (doi:10.1039/c7nr01755c), 2017-01-01
Supplement: c7nr01755c1.pdf [file c7nr01755c1.pdf]

## Supplementary Information

### Synthesis and fast transfer of monolayer MoS<sub>2</sub> on reusable fused silica

Tao Liang,<sup>a,b</sup> Shuang Xie,<sup>c</sup> Weifei Fu,<sup>b</sup> Yu Cai,<sup>b</sup> Chinnathambi Shanmugavel,<sup>d</sup> Hideo Iwai,<sup>e</sup> Daisuke Fujita,<sup>f</sup> Nobutaka Hanagata,<sup>d</sup> Hongzhen Chen<sup>b</sup> and Mingsheng Xu<sup>\*a</sup>

*<sup>a</sup>College of Information Science & Electronic Engineering, State Key Laboratory of Silicon Materials, Zhejiang University, Hangzhou 310027, P. R. China. E-mail: msxu@zju.edu.cn*

*<sup>b</sup>Department of Polymer Science and Engineering, Zhejiang University, Hangzhou 310027, P. R. China.*

*<sup>c</sup>School of Materials Science and Engineering, Zhejiang University, Hangzhou 310027, P. R. China.*

*<sup>d</sup>Nanotechnology Innovation Station, National Institute for Materials Science, Tsukuba 305-0047, Japan.*

*<sup>e</sup>Surface & Microbeam Analysis, Materials Analysis Station, National Institute for Materials Science, Tsukuba 305-0047, Japan.*

*<sup>f</sup>Nano Characterization Unit, National Institute for Materials Science, Tsukuba 305-0047, Japan.*

## Experimental Section

**Sample Preparation.** Monolayer MoS<sub>2</sub> was synthesized by CVD in a three-zone furnace according to the procedures described previously.<sup>29</sup> MoO<sub>3</sub> (Alfa Aesar, 15mg) and S powder (ZNXC, 100mg) were used as Mo and S precursors with a distance of ~20cm. Ar was used as the carrier gas with a flow rate of 100sccm. The pressure maintains ~1000Pa during growth. The temperature for the central MoO<sub>3</sub> source ramped up to 750 °C in 60 min and maintained for 20 min. The temperature for the upstream sulfur source increased along with the MoO<sub>3</sub> temperature with a maximal of 250 °C.

**Fast transfer technique.** A thin layer of PMMA (~200nm) was spin-coated onto MoS<sub>2</sub>/fused silica and cured for 10min at 150 °C. Then the PMMA/MoS<sub>2</sub>/fused silica was immersed into 40% HF solution for 5s to detach the edge. After that the PMMA/MoS<sub>2</sub>/fused silica was pulled out and gradually immersed into water within 10s. The PMMA/MoS<sub>2</sub> detached from the fused silica surface during the immersing process. At last, the clean desired substrate was used to scope out the PMMA/MoS<sub>2</sub>. PMMA was removed in acetone after drying.

**Characterization of MoS<sub>2</sub>.** Optical images are taken by Nikon LV100 POL, SEM images are obtained on S-4800, Hitachi, with an accelerating voltage of 3.0kV. The Raman and PL tests are performed on Ramanplus, Nanophoton with a 532 nm laser source. The crystalline structures are examined by TEM (JEM, 2100F, 200 kV). The AES measurements are carried out with a scanning Auger electron spectroscope (ULVAC-PHI model SAM650) equipped with a cylindrical mirror analyzer. The AES

spectra and area analysis are acquired with a primary electron beam of 10 kV and a takeoff angle of  $42^\circ$ . AFM images are obtained on Veeco 3D with a tapping mode.

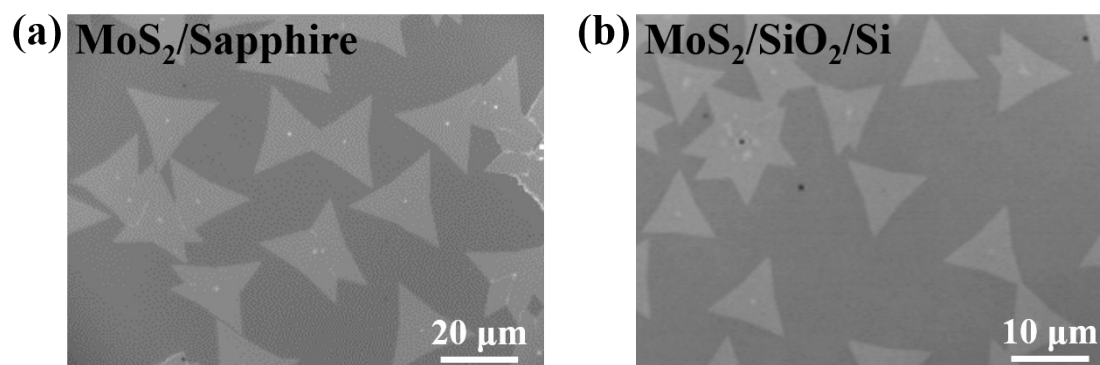

**Fig. S1** Optical microscopy images of MoS<sub>2</sub> domains synthesized on (a) sapphire and (b) SiO<sub>2</sub>(300nm)/Si substrates.

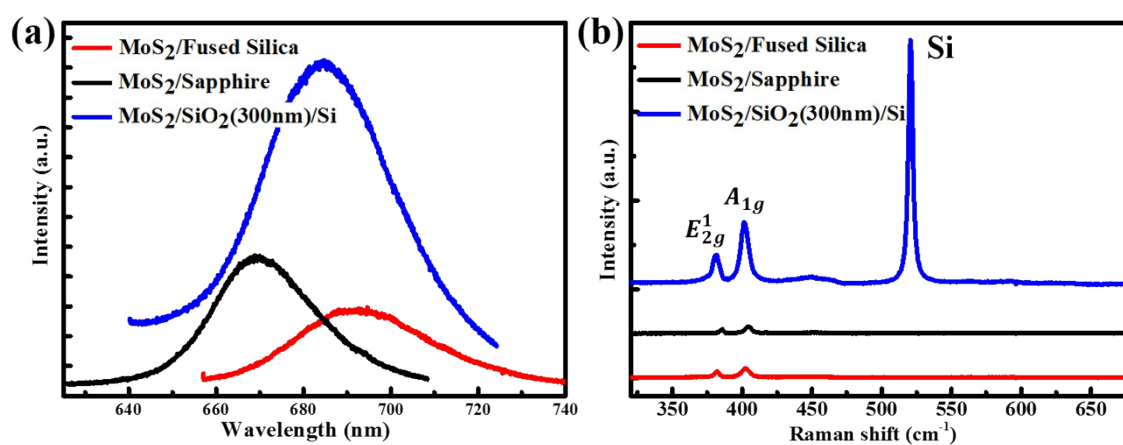

**Fig. S2** (a) Raman and (b) PL spectra of MoS<sub>2</sub> domains synthesized on various substrates including fused silica, sapphire, and SiO<sub>2</sub>(300nm)/Si.

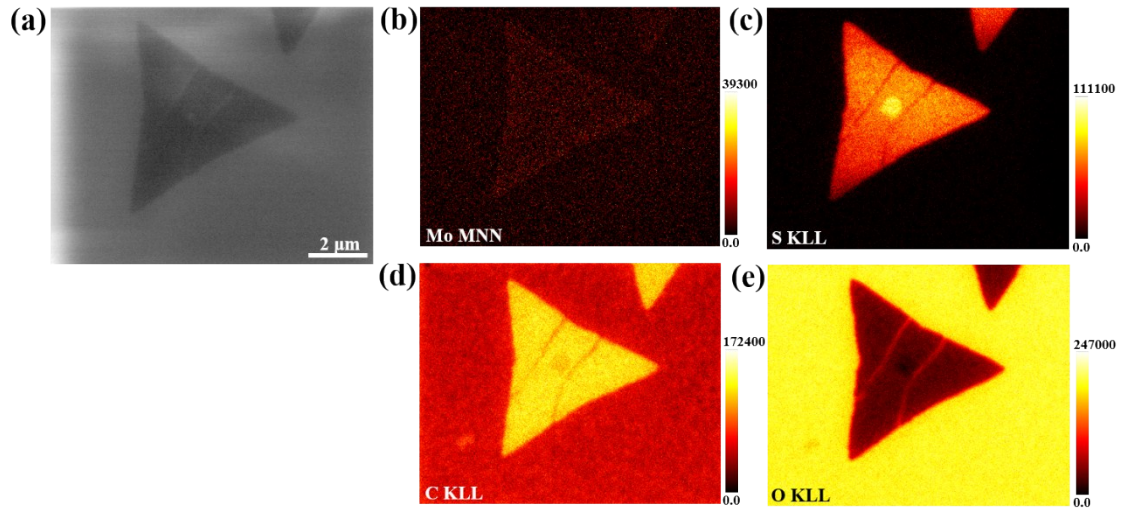

**Fig. S3** AES characterization of a MoS<sub>2</sub> domain. (a) A secondary electron image of the sample showing the elements mapping region. (b) Mo MNN Auger electron map. (c) S KLL Auger electron map. (d) C KLL Auger electron map. (e) O KLL Auger electron map. The maps show the cracks clearly generated during the cooling stage of synthesis.
